# Supplementary material for: Systemic and Local Medical or Surgical Therapies for Ear, Nose and/or Throat Manifestations in ANCA-Associated Vasculitis: A Systematic Literature Review
Source: MDPI journal article supplement (doi:10.3390/jcm12093173), 2023-04-28
Supplement: s1 [file s1]

## **Supplementary material**

### **Supplementary Material S1: Search string**

A search with these search strings was performed on 10-01-2022, applying a filter for publication date from 01-01-2005 till 01-01-2022

#### **Pubmed**

((((((((((((((Otorhinolaryngologic Diseases[MeSH Terms]) OR Ear diseases[MeSH Terms]) OR Laryngeal diseases[MeSH Terms]) OR Nose diseases[MeSH Terms]) OR Otorhinolaryngologic\*[Title/Abstract]) OR Otolaryngologic\*[Title/Abstract]) OR ENT[Title/Abstract]) OR ear[Title/Abstract]) OR nose[Title/Abstract]) OR throat[Title/Abstract]) OR otologic\*[Title/Abstract]) OR laryn\*[Title/Abstract]) OR rhinolog\*[Title/Abstract]) OR nasal[Title/Abstract])) AND (((((((((((((((Anti-Neutrophil Cytoplasmic Antibody-Associated Vasculitis[MeSH Terms]) OR Churg-Strauss Syndrome[MeSH Terms]) OR Granulomatosis with Polyangiitis[MeSH Terms]) OR Microscopic Polyangiitis[MeSH Terms]) OR Anti Neutrophil Cytoplasmic Antibody Associated Vasculitis[Title/Abstract]) OR Anti-Neutrophil Cytoplasmic Antibody-Associated Vasculitis[Title/Abstract]) OR ANCA-Associated Vasculit\*[Title/Abstract]) OR ANCA Associated Vasculit\*[Title/Abstract]) OR AAV[Title/Abstract]) OR Pauci\*[Title/Abstract]) OR Churg-Strauss[Title/Abstract]) OR Churg Strauss[Title/Abstract]) OR Granulomatous Angiit\*[Title/Abstract]) OR Allergic angiit\*[Title/Abstract]) OR EGPA[Title/Abstract]) OR Eosinophilic Granulomatosis with Polyangiit\*[Title/Abstract]) OR Granulomatosis with Polyangiit\*[Title/Abstract]) OR Wegener\*[Title/Abstract]) OR GPA[Title/Abstract]) OR MPA[Title/Abstract]) OR Microscopic Polyangiit\*[Title/Abstract]))

#### **Embase**

('ear nose throat disease'/exp OR 'ear disease'/exp OR 'nose disease'/exp OR 'throat disease'/exp OR 'otorhinolaryngologic\*':ti,ab,kw OR 'otolaryngologic\*':ti,ab,kw OR 'ent':ti,ab,kw OR 'ear':ti,ab,kw OR 'nose':ti,ab,kw OR 'throat':ti,ab,kw OR 'otologic\*':ti,ab,kw OR 'laryn\*':ti,ab,kw OR 'rhinolog\*':ti,ab,kw OR 'nasal\*':ti,ab,kw) AND ('anca associated vasculitis'/exp OR 'churg strauss syndrome'/exp OR 'granulomatous vasculitis'/exp OR 'microscopic polyangiitis'/exp OR 'wegener granulomatosis'/exp OR 'anti neutrophil

cytoplasmic antibody associated vasculitis':ti,ab,kw OR 'anti-neutrophil cytoplasmic antibody-associated vasculitis':ti,ab,kw OR 'anca associated vasculit\*':ti,ab,kw OR 'anca-associated vasculit\*':ti,ab,kw OR 'aav':ti,ab,kw OR 'pauci\*':ti,ab,kw OR 'churg-strauss':ti,ab,kw OR 'churg strauss':ti,ab,kw OR 'granulomatous angiit\*':ti,ab,kw OR 'egpa':ti,ab,kw OR 'eosinophilic granulomatosis with polyangiit\*':ti,ab,kw OR 'granulomatosis with polyangiit\*':ti,ab,kw OR 'wegener\*':ti,ab,kw OR 'gpa':ti,ab,kw OR 'mpa':ti,ab,kw OR 'microscopic polyangiit\*':ti,ab,kw)

**Supplementary Table S1. PICO formulated question**

|                                                                                                                                                        |
|--------------------------------------------------------------------------------------------------------------------------------------------------------|
| <b>Question:</b> What is the effect of systemic immunosuppressive treatment or local therapy on ENT activity in patients with AAV and ENT involvement? |
| Population: Patients with AAV and ENT involvement                                                                                                      |
| Intervention: systemic immunosuppressive therapy or local therapy                                                                                      |
| Comparison: different immunosuppressive agents or other local therapies, no systemic immunosuppressive therapy of local therapy, no control group      |
| Outcome: ENT disease activity                                                                                                                          |

**Supplementary Table S2. Levels of evidence according to the Oxford centre for evidence-based medicine [27]**

| Level | Description                                                              |
|-------|--------------------------------------------------------------------------|
| 1a    | Systematic review of randomized controlled trials                        |
| 1b    | Individual randomized controlled trial                                   |
| 2a    | Systematic review of cohort studies                                      |
| 2b    | Individual cohort studies (and low quality randomized controlled trials) |
| 3a    | Systematic review of case-control studies                                |
| 3b    | Individual case-control studies                                          |
| 4     | Case-series (and poor quality cohort and case-control studies)           |

**Supplementary Table S3. Overview of all articles included in full-text assessment**

| Article name                                                                                                                                                                                           | First author      |
|--------------------------------------------------------------------------------------------------------------------------------------------------------------------------------------------------------|-------------------|
| Airway involvement in granulomatosis with polyangiitis patients                                                                                                                                        | Acharya           |
| Rituximab for the treatment of eosinophilic granulomatosis with polyangiitis: A systematic literature review                                                                                           | Akiyama           |
| Upper airway manifestations of granulomatosis with polyangiitis.                                                                                                                                       | Alam              |
| Current Therapeutic Approaches to Subglottic Stenosis in Patients With GPA: A Systematic Review                                                                                                        | Almuhanna         |
| New treatment of subglottic stenosis due to Wegener's granulomatosis                                                                                                                                   | Arebro            |
| Otologic Manifestations of Eosinophilic Granulomatosis With Polyangiitis: A Systematic Review                                                                                                          | Ashman            |
| Ear, nose and throat manifestations of Churg-Strauss syndrome                                                                                                                                          | Bacciu            |
| Nasal Polyposis in Churg-Strauss Syndrome                                                                                                                                                              | Bacciu            |
| Anti-cytokine targeted therapies for ANCA-associated vasculitis                                                                                                                                        | Bala              |
| Granulomatosis with polyangiitis in Tunisia                                                                                                                                                            | Ben Ghorbel       |
| Staphylococcus Aureus carriage and long-term Rituximab treatment for Granulomatosis with polyangiitis                                                                                                  | Besada            |
| Mepolizumab for Eosinophilic Granulomatosis With Polyangiitis: A European Multicenter Observational Study.                                                                                             | Bettiol           |
| Sinonasal Wegener granulomatosis: a single-institution experience with 120 cases.                                                                                                                      | Cannady           |
| Head and neck manifestations of granulomatosis with polyangiitis: A Retrospective analysis of 19 Patients and Review of the Literature                                                                 | Carnevale         |
| Presentation, Diagnosis and Management of Subglottic and Tracheal Stenosis During Systemic Inflammatory Diseases                                                                                       | Catano            |
| Rituximab prescription patterns and efficacy in the induction treatment of ANCA-Associated Vasculitis in a Belgian multicenter cohort.                                                                 | Chasseur          |
| Factors Affecting Dilation Interval in Patients With Granulomatosis With Polyangiitis-Associated Subglottic and Glottic Stenosis                                                                       | Chen              |
| Clinical [corrected] and pathological characteristics of Chinese patients with antineutrophil cytoplasmic autoantibody associated systemic vasculitides: a study of 426 patients from a single centre. | Chen              |
| Trimethoprim-sulfamethoxazole and antineutrophil cytoplasmic antibodies-associated vasculitis.                                                                                                         | Cohen<br>Tervaert |
| What is the best treatment option for granulomatosis with polyangiitis?                                                                                                                                | Comarmond         |
| Granulomatosis with polyangiitis (Wegener): clinical aspects and treatment.                                                                                                                            | Comarmond         |
| Saddle nose deformity and septal perforation in granulomatosis with polyangiitis.                                                                                                                      | Coordes           |
| Eosinophilic granulomatosis with polyangiitis (Churg-Strauss)                                                                                                                                          | Cordier           |
| The complexity of classifying ANCA-associated small-vessel vasculitis in actual clinical practice: data from a multicenter retrospective survey.                                                       | Corral-Gudino     |

|                                                                                                                                                                                                                     |                     |
|---------------------------------------------------------------------------------------------------------------------------------------------------------------------------------------------------------------------|---------------------|
| Subglottic Stenosis in Granulomatosis With Polyangiitis: The Role of Laryngotracheal Resection.                                                                                                                     | Costantino          |
| Features at presentation in a series of patients (n=10) with Churg-Strauss syndrome                                                                                                                                 | Coulter             |
| Randomized trial of cyclophosphamide versus methotrexate for induction of remission in early systemic antineutrophil cytoplasmic antibody-associated vasculitis.                                                    | De Groot            |
| Wegener's granulomatosis: experience from a Brazilian tertiary center.                                                                                                                                              | de Souza            |
| Real-life evidence of low-dose mepolizumab efficacy in EGPA: a case series.                                                                                                                                         | Detoraki            |
| Long-Term Followup of a Multicenter Cohort of 101 Patients With Eosinophilic Granulomatosis With Polyangiitis (Churg-Strauss)                                                                                       | Durel               |
| Wegener's granulomatosis: current trends in diagnosis and management.                                                                                                                                               | Erickson            |
| Nine patients with anti-neutrophil cytoplasmic antibody-positive vasculitis successfully treated with rituximab.                                                                                                    | Eriksson            |
| Ear, nose and throat involvement in granulomatosis with polyangiitis: how it presents and how it determines disease severity and long-term outcomes                                                                 | Felicett            |
| Intratracheal Dilation-injection Technique in the Treatment of Granulomatosis with Polyangiitis Patients with Subglottic Stenosis                                                                                   | Fijolek             |
| Disease heterogeneity in antineutrophil cytoplasmic antibody-associated vasculitis: implications for therapeutic approaches                                                                                         | Ford                |
| Granulomatous disorders of the nose and paranasal sinuses.                                                                                                                                                          | Fuchs               |
| Rituximab in relapsed/refractory antineutrophil cytoplasmic antibody associated vasculitis: A single-center prospective observational study                                                                         | Gayatri             |
| Head and neck manifestations of Wegener's granulomatosis.                                                                                                                                                           | Gottschlich         |
| Treatment for adult idiopathic and Wegener-associated subglottic stenosis.                                                                                                                                          | Gouveris            |
| Clinic manifestations in granulomatosis with polyangiitis                                                                                                                                                           | Greco               |
| Microscopic polyangiitis: Advances in diagnostic and therapeutic approaches                                                                                                                                         | Greco               |
| Multilevel airway stenosis in patients with granulomatosis with polyangiitis (Wegener's).                                                                                                                           | Guardiani           |
| Benralizumab as a Steroid-Sparing Treatment Option in Eosinophilic Granulomatosis with Polyangiitis                                                                                                                 | Guntur              |
| Otorhinolaryngological findings in a group of patients with rheumatic diseases.                                                                                                                                     | Gusmao              |
| Clinical features and treatment outcomes of otitis media with antineutrophil cytoplasmic antibody (ANCA)-associated vasculitis (OMAAV): A retrospective analysis of 235 patients from a nationwide survey in Japan. | Harabuchi           |
| Morbidity in patients with ANCA-associated vasculitis                                                                                                                                                               | Harper              |
| ANCA-associated vasculitis: diagnosis, clinical characteristics and treatment                                                                                                                                       | Haubitz             |
| Surgical interventions and local therapy for Wegener's granulomatosis.                                                                                                                                              | Hernandez-Rodriguez |

|                                                                                                                                                                 |            |
|-----------------------------------------------------------------------------------------------------------------------------------------------------------------|------------|
| Mycophenolate Mofetil vs Azathioprine for Remission Maintenance in Antineutrophil Cytoplasmic Antibody–Associated VasculitisA Randomized Controlled Trial       | Hiemstra   |
| [Liposomal local therapy of sinunasal symptoms in ANCA associated vasculitis].                                                                                  | Hofauer    |
| ANCA-associated vasculitides: pathogenetic aspects and current evidence-based therapy.                                                                          | Holle      |
| Rituximab for refractory granulomatosis with polyangiitis (Wegener's granulomatosis): comparison of efficacy in granulomatous versus vasculitic manifestations. | Holle      |
| Impact of Paranasal Sinus Surgery in Granulomatosis With Polyangiitis: A Longitudinal Computed Tomography Study                                                 | Holme      |
| The association between ear involvement and clinical features and prognosis in ANCA-associated vasculitis                                                       | Hosokawa   |
| Subglottic stenosis: a ten-year review of treatment outcomes.                                                                                                   | Hseu       |
| Localised Versus Systemic Granulomatosis with Polyangiitis: Data from the French Vasculitis Study Group Registry.                                               | Iudici     |
| The hearing prognosis of otitis media with ANCA-associated vasculitis                                                                                           | Iwata      |
| Rituximab for ANCA-associated vasculitis: The UK experience                                                                                                     | Jayne      |
| Is rituximab 'The Wonder Drug' for antineutrophil cytoplasmic antibodies-associated vasculitis?                                                                 | Jha        |
| Systematic review of safety and efficacy of belimumab in treating immune-mediated disorders                                                                     | Kaegi      |
| What is the evidence for prophylactic antibiotic treatment in patients with systemic vasculitides?                                                              | Kallenberg |
| Oral corticosteroid-sparing effects of reslizumab in the treatment of eosinophilic granulomatosis with polyangiitis                                             | Kent       |
| Inflammatory diseases of the nose and the paranasal sinuses                                                                                                     | Klimek     |
| Clinical aspects of granulomatosis with polyangiitis affecting the head and neck.                                                                               | Knopf      |
| Chapter 11: Granulomatous diseases and chronic sinusitis.                                                                                                       | Kohanski   |
| Manifestation of granulomatosis with polyangiitis in head and neck.                                                                                             | Kuhn       |
| Clinical profile and long-term outcome of granulomatosis with polyangiitis (GPA): A corporate hospital-based study from northern India                          | Kumar      |
| Effectiveness of Rituximab for the Otolaryngologic Manifestations of Granulomatosis With Polyangiitis (Wegener's)                                               | Lally      |
| Update on clinical, pathophysiological and therapeutic aspects in ANCA-associated vasculitides.                                                                 | Lamprecht  |
| Update on the treatment of granulomatosis with polyangiitis (Wegener's)                                                                                         | Langford   |
| Modern management of primary systemic vasculitis                                                                                                                | Lapraik    |
| [Diagnosis, therapy and current research aspects of selected chronic inflammatory diseases with head and neck involvement].                                     | Laudien    |

|                                                                                                                                                                                                                             |                   |
|-----------------------------------------------------------------------------------------------------------------------------------------------------------------------------------------------------------------------------|-------------------|
| Chronic rhinosinusitis in eosinophilic granulomatosis with polyangiitis: clinical presentation and antineutrophil cytoplasmic antibodies                                                                                    | Low               |
| Diagnosis and classification of granulomatosis with polyangiitis (aka Wegener's granulomatosis)                                                                                                                             | Lutalo            |
| Otolaryngological progression of granulomatosis with polyangiitis after systemic treatment with rituximab.                                                                                                                  | Malm              |
| Localized Wegener's granulomatosis.                                                                                                                                                                                         | Maranzo           |
| Methotrexate vs cyclophosphamide as maintenance therapy in severe eosinophilic granulomatosis with polyangiitis: a subanalysis of the powercime trial                                                                       | Maritati          |
| Long-term damage to the ENT system in Wegener's granulomatosis                                                                                                                                                              | Martinez del Pero |
| Off-label use of biologics for the treatment of refractory and/or relapsing granulomatosis with polyangiitis.                                                                                                               | Mettler           |
| Efficacy of glucocorticoids to treat limited flares in ancaassociated vasculitis                                                                                                                                            | Miloslavsky       |
| Outcomes of nonsevere relapses in antineutrophil cytoplasmic antibody-associated vasculitis treated with glucocorticoids                                                                                                    | Miloslavsky       |
| Clinical outcomes of remission induction therapy for severe antineutrophil cytoplasmic antibody-associated vasculitis                                                                                                       | Miloslavsky       |
| Vestibular Involvement in Patients With Otitis Media With Antineutrophil Cytoplasmic Antibody-associated Vasculitis.                                                                                                        | Morita            |
| Results of endoscopic surgery and intralesional steroid therapy for airway compromise due to tracheobronchial Wegener's granulomatosis.                                                                                     | Nouraei           |
| Successful use of rituximab in six patients with relapsing eosinophilic granulomatosis with polyangiitis                                                                                                                    | Novikov           |
| The treatment outcomes of rituximab for intractable otitis media with ANCA-associated vasculitis.                                                                                                                           | Okada             |
| Utility of a one-stop joint ent-vasculitis clinic in the management of relapsing ANCA-associated vasculitis                                                                                                                 | O'malley          |
| Clinical features and outcomes of 37 Argentinean patients with severe granulomatosis with polyangiitis (wegener granulomatosis).                                                                                            | Orden             |
| Relapses in patients with anti-neutrophil cytoplasmic antibody-associated vasculitis: a retrospective study.                                                                                                                | Outh              |
| Azathioprine or methotrexate maintenance for ANCA-associated vasculitis                                                                                                                                                     | Pagnoux           |
| Treatment of systemic necrotizing vasculitides in patients aged sixty-five years or older: results of a multicenter, open-label, randomized controlled trial of corticosteroid and cyclophosphamide-based induction therapy | Pagnoux           |
| Wegener's granulomatosis strictly and persistently localized to one organ is rare: assessment of 16 patients from the French Vasculitis Study Group database.                                                               | Pagnoux           |
| Office-based corticosteroid injections as adjuvant therapy for subglottic stenosis                                                                                                                                          | Pan               |
| The role of surgery in antineutrophil cytoplasmic antibody-associated vasculitides affecting the nose and sinuses: A systematic review.                                                                                     | Pendolino         |

|                                                                                                                                                                                                                                                 |                 |
|-------------------------------------------------------------------------------------------------------------------------------------------------------------------------------------------------------------------------------------------------|-----------------|
| Sirolimus use in patients with subglottic stenosis in the context of granulomatosis with polyangiitis (GPA), suspected GPA, and immunoglobulin G4-related disease                                                                               | Poo             |
| Non-severe eosinophilic granulomatosis with polyangiitis: long-term outcomes after remission-induction trial.                                                                                                                                   | Puechal         |
| Adding Azathioprine to Remission-Induction Glucocorticoids for Eosinophilic Granulomatosis With Polyangiitis (Churg-Strauss), Microscopic Polyangiitis, or Polyarteritis Nodosa Without Poor Prognosis Factors: A Randomized, Controlled Trial. | Puechal         |
| Treatment of Polyarteritis Nodosa and Microscopic Polyangiitis Without Poor-Prognosis Factors                                                                                                                                                   | Ribi            |
| Treatment of Churg-Strauss syndrome without poor-prognosis factors: a multicenter, prospective, randomized, open-label study of seventy-two patients                                                                                            | Ribi            |
| Response to mepolizumab according to disease manifestations in patients with eosinophilic granulomatosis with polyangiitis                                                                                                                      | Rios-Garces     |
| Damage in the anca-associated vasculitides: Long-term data from the European Vasculitis Study group (EUVAS) therapeutic trials                                                                                                                  | Robson          |
| Laryngeal and tracheobronchial involvement in Wegener's granulomatosis.                                                                                                                                                                         | Rodrigues       |
| A Case Series of Granulomatosis With Polyangiitis Primarily Diagnosed by Otological Manifestations.                                                                                                                                             | Sahyouni        |
| Long-term outcomes of 118 patients with eosinophilic granulomatosis with polyangiitis (Churg-Strauss syndrome) enrolled in two prospective trials.                                                                                              | Samson          |
| Dilatation tracheoscopy for laryngeal and tracheal stenosis in patients with Wegener's granulomatosis.                                                                                                                                          | Schokkenbroek   |
| Granulomatosis with polyangiitis: Experience of 42 patients from a single-center, tertiary care hospital in Mumbai                                                                                                                              | Singh           |
| Granulomatosis with polyangiitis: Clinical manifestations, laboratory parameters, and outcome of 26 patients from a single center in Mumbai, Maharashtra, India                                                                                 | Singh           |
| Clinical features and therapeutic management of subglottic stenosis in patients with Wegener's granulomatosis.                                                                                                                                  | Solans-Laquerre |
| Clinical characteristics and outcome of Spanish patients with ANCA-associated vasculitides: Impact of the vasculitis type, ANCA specificity, and treatment on mortality and morbidity.                                                          | Solans-Laquerre |
| Rituximab plus methotrexate combination as a salvage therapy in persistently active granulomatosis with polyangiitis                                                                                                                            | Sorin           |
| Patterns of presentation and diagnosis of patients with Wegener's granulomatosis: ENT aspects.                                                                                                                                                  | Srouji          |
| Evaluation of clinical benefit from treatment with mepolizumab for patients with eosinophilic granulomatosis with polyangiitis                                                                                                                  | Steinfeld       |
| Technique of laryngotracheal resection in subglottic stenosis.                                                                                                                                                                                  | Stoelben        |

|                                                                                                                                                               |             |
|---------------------------------------------------------------------------------------------------------------------------------------------------------------|-------------|
| Rituximab versus cyclophosphamide for induction of remission in ANCA-associated vasculitis: a randomized controlled trial (RAVE)                              | Stone       |
| Wegener's granulomatosis causing subglottic stenosis: Experiences at a tertiary care hospital of the Eastern India                                            | Swain       |
| Otitis media with ANCA-associated vasculitis: A retrospective study of 30 patients.                                                                           | Tabei       |
| Survival of patients with Wegener's granulomatosis diagnosed in Finland in 1981-2000.                                                                         | Takala      |
| No evident association of nasal carriage of Staphylococcus aureus or its small-colony variants with cotrimoxazole use or ANCA-associated vasculitis relapses. | Tan         |
| Clinical manifestations and treatment of idiopathic and Wegener granulomatosis-associated subglottic stenosis.                                                | Taylor      |
| Progression and management of Wegener's granulomatosis in the head and neck.                                                                                  | Taylor      |
| Efficacy and safety of rituximab in the treatment of eosinophilic granulomatosis with polyangiitis                                                            | Teixeira    |
| Clinical Features of Patients with Active Eosinophilic Granulomatosis with Polyangiitis Successfully Treated with Mepolizumab                                 | Tsurikisawa |
| Effectiveness and safety of mepolizumab in combination with corticosteroids in patients with eosinophilic granulomatosis with polyangiitis                    | Ueno        |
| Optimizing the therapeutic strategies in ANCA-associated vasculitis--single centre experience with international randomized trials.                           | Vanková     |
| Mepolizumab or Placebo for Eosinophilic Granulomatosis with Polyangiitis.                                                                                     | Wechsler    |
| Effect of Treatment on Damage and Hospitalization in Elderly Patients with Microscopic Polyangiitis and Granulomatosis with Polyangiitis                      | Weiner      |
| Otologic symptoms as initial manifestation of wegener granulomatosis: diagnostic dilemma.                                                                     | Wierzbicka  |
| Intralesional corticosteroid injection and dilatation provides effective management of subglottic stenosis in Wegener's granulomatosis.                       | Wolter      |
| Management of anca-associated vasculitis in the UK: A complex pathway of patient referral, diagnosis, and treatment                                           | Worthington |
| Clinical and serological features of eosinophilic and vasculitic phases of eosinophilic granulomatosis with poliangiitis: A case series of 15 patients        | Yilmaz      |
| Reversible cochlear function with ANCA-associated vasculitis initially diagnosed by otologic symptoms.                                                        | Yoshida     |
| The Liverpool experience: The role of immunosuppression in treating vasculitic subglottic stenosis                                                            | Zammit      |
| Subglottic and tracheal stenosis due to Wegener's granulomatosis.                                                                                             | Zycinska    |
| Co-trimoxazole and prevention of relapses of PR3-ANCA positive vasculitis with pulmonary involvement.                                                         | Zycinska    |
